# Supplementary material for: Hospital Incidence and Treatment Outcomes of Patients with Aneurysms and Dissections of the Iliac Artery in Switzerland—A Secondary Analysis of Swiss DRG Statistics Data
Source: MDPI journal article supplement (doi:10.3390/jcm13082267), 2024-04-14

**Supplementary Table 1: Patient Identification**

|                                          | <b>Surgical Treatment (CHOP-Code)</b>                                                                                                                                                                                                                                              |                           | <b>No Surgical Treatment (No CHOP-Code)</b>                                                                                                                                                                                                                                                                                                  |                           |
|------------------------------------------|------------------------------------------------------------------------------------------------------------------------------------------------------------------------------------------------------------------------------------------------------------------------------------|---------------------------|----------------------------------------------------------------------------------------------------------------------------------------------------------------------------------------------------------------------------------------------------------------------------------------------------------------------------------------------|---------------------------|
|                                          | <b>Acute Admission</b>                                                                                                                                                                                                                                                             | <b>Elective Admission</b> | <b>Acute Admission</b>                                                                                                                                                                                                                                                                                                                       | <b>Elective Admission</b> |
| <b>Primary Diagnosis<br/>ICD-I72.3</b>   | Include (n=111)                                                                                                                                                                                                                                                                    | Include (n=653)           | Include* (n=193) <ul style="list-style-type: none"> <li>Excluded if discharged to another acute care hospital to avoid duplicates.</li> </ul> <p><i>This heterogenous cohort includes palliative treatment of ruptured iliac aneurysms as well as conservative management for acute uncomplicated dissections of the iliac arteries.</i></p> | Exclude (n=893)           |
| <b>Secondary Diagnosis<br/>ICD-I72.3</b> | Include* (n=53) <ul style="list-style-type: none"> <li>Only included if primary diagnosis was <i>not</i> aortic aneurysm (AAA = I71.3 or I71.4 or TAAA = I71.5 or I71.6)</li> <li>Only included if primary diagnosis was <i>not</i> aortic dissection (I71.00 - I71.07)</li> </ul> | Include* (n=134)          | Exclude<br>(n= 5'812)                                                                                                                                                                                                                                                                                                                        |                           |

**Supplementary Table 2: CHOP Codes**

| <b>Code</b>                                                                      | <b>Open Repair</b> (translated, original available in German or French)                     |
|----------------------------------------------------------------------------------|---------------------------------------------------------------------------------------------|
| 38.36.17                                                                         | Resection of the iliac artery with anastomosis                                              |
| 39.25.11                                                                         | Aorto-iliac bypass                                                                          |
| 39.25.12                                                                         | Aorto-femoral bypass                                                                        |
| 39.25.19                                                                         | Aorto-iliac-femoral Bypass, aortic                                                          |
| 39.25.21                                                                         | Iliac-iliac bypass                                                                          |
| 39.25.22                                                                         | Iliac-femoral bypass                                                                        |
| 39.25.99                                                                         | Aorto-iliac-femoral Bypass, other                                                           |
| 39.57.48                                                                         | Reconstruction of the iliac artery with synthetic implant                                   |
| <b>Endovascular Therapy</b> (translated, original available in German or French) |                                                                                             |
| 39.79.12                                                                         | Endovascular implantation of stentgraft in iliac arteries                                   |
| 39.78.11                                                                         | <i>Additional coding to 39.79.12, since 2014: Tube graft without branch or fenestration</i> |
| 39.78.12                                                                         | <i>Additional coding to 39.79.12, since 2014: Branched graft</i>                            |
| 39.78.13                                                                         | <i>Additional coding to 39.79.12, since 2014: Fenestrated graft</i>                         |
| 39.78.19                                                                         | <i>Additional coding to 39.79.12, since 2014: Other graft</i>                               |
| 39.79.20                                                                         | Coil-embolization or occlusion of vessel not further specified                              |
| 39.79.26                                                                         | Coil-embolization or occlusion of abdominal vessel                                          |
| 39.79.29                                                                         | Coil-embolization or occlusion of vessel, other                                             |

**Supplementary Table 3: ICD-Codes for Complications**

| <b>ICD-Code</b>                   | <b>Comorbidities</b>              |
|-----------------------------------|-----------------------------------|
| DOI: 10.1097/MLR.0b013e31819432e5 | Elixhauser Comorbidity Score (ES) |
| I25*                              | Chronic ischemic heart disease    |
| I50*                              | Chronic heart failure             |
| G45*, G46*, H340*, I6*            | Cerebrovascular disease           |
| Elixhauser Item No. 6             | Hypertension                      |
| Elixhauser Item No. 9             | Chronic pulmonary disease         |
| Elixhauser Item No. 10 and 11     | Diabetes mellitus                 |
| Elixhauser Item No. 13            | Chronic kidney disease            |
| Elixhauser Item No. 17, 18 and 19 | Cancer                            |
| Elixhauser Item No. 22            | Obesity                           |

| <b>ICD-Code</b> | <b>Complications</b>                  |
|-----------------|---------------------------------------|
| I21.*, I22.*    | Acute/Recurrent myocardial infarction |
| I74.*           | Acute limb ischemia                   |
| K55.0           | Acute mesenteric infarction           |

**Supplementary Table 4: Conservative Management acute ADIA**

| Variable                  | Male<br>(N=159) | Female<br>(N=34) | Total<br>(N=193) | p value |
|---------------------------|-----------------|------------------|------------------|---------|
| Age, years                | 77 (68, 84)     | 75 (68, 84)      | 77 (68, 84)      | 0.972   |
| van Walraven score        | 5 (0, 14)       | 3 (0, 11)        | 5 (0, 13)        | 0.529   |
| Coronary artery disease   | 33 (21)         | 8 (24)           | 41 (21)          | 0.72    |
| Chronic heart failure     | 16 (10)         | 3 (8.8)          | 19 (9.8)         | >0.999  |
| Cerebrovascular disease   | 5 (3.1)         | 1 (2.9)          | 6 (3.1)          | >0.999  |
| Arterial hypertension     | 53 (33)         | 18 (53)          | 71 (37)          | 0.031   |
| Chronic pulmonary disease | 17 (11)         | 3 (8.8)          | 20 (10)          | >0.999  |
| Diabetes mellitus         | 12 (7.5)        | 1 (2.9)          | 13 (6.7)         | 0.471   |
| Chronic kidney disease    | 40 (25)         | 5 (15)           | 45 (23)          | 0.191   |
| Cancer                    | 1 (0.6)         | 1 (2.9)          | 2 (1.0)          | 0.322   |
| Obesity                   | 4 (2.5)         | 0 (0)            | 4 (2.1)          | >0.999  |
| Type of hospital          |                 |                  |                  | 0.842   |
| University hospital       | 36 (23)         | 8 (24)           | 44 (23)          |         |
| Major hospital            | 98 (62)         | 22 (65)          | 120 (62)         |         |
| Other                     | 25 (16)         | 4 (12)           | 29 (15)          |         |
| Location before admission |                 |                  |                  | 0.164   |
| Home                      | 133 (84)        | 26 (76)          | 159 (82)         |         |
| Nursing Home              | 1 (0.6)         | 2 (5.9)          | 3 (1.6)          |         |
| Other                     | 9 (5.7)         | 2 (5.9)          | 11 (5.7)         |         |
| Acute care Hospital       | 16 (10)         | 4 (12)           | 20 (10)          |         |
| Treatment period          |                 |                  |                  | 0.085   |
| 2011-2014                 | 82 (52)         | 12 (35)          | 94 (49)          |         |
| 2015-2018                 | 77 (48)         | 22 (65)          | 99 (51)          |         |
| Length of hospital stay   | 8 (4, 15)       | 11 (3, 19)       | 9 (3, 16)        | 0.392   |
| Mortality                 | 46 (29)         | 7 (21)           | 53 (27)          | 0.323   |

Data were complete. Counts are presented with percentages and compared using Chi2-tests. Continuous variables are summarized with median and percentiles 25 and 75 and compared using Kruskal-Wallis rank tests. ICD-10 codes to identify comorbidities are available in the supplement. ICU = Intensive care unit. Destination after discharge also includes mortality; this level is not shown as it is redundant with the hospital mortality variable. NA = not applicable (no events in both groups).

Supplementary Figure 1: Management of ADIA

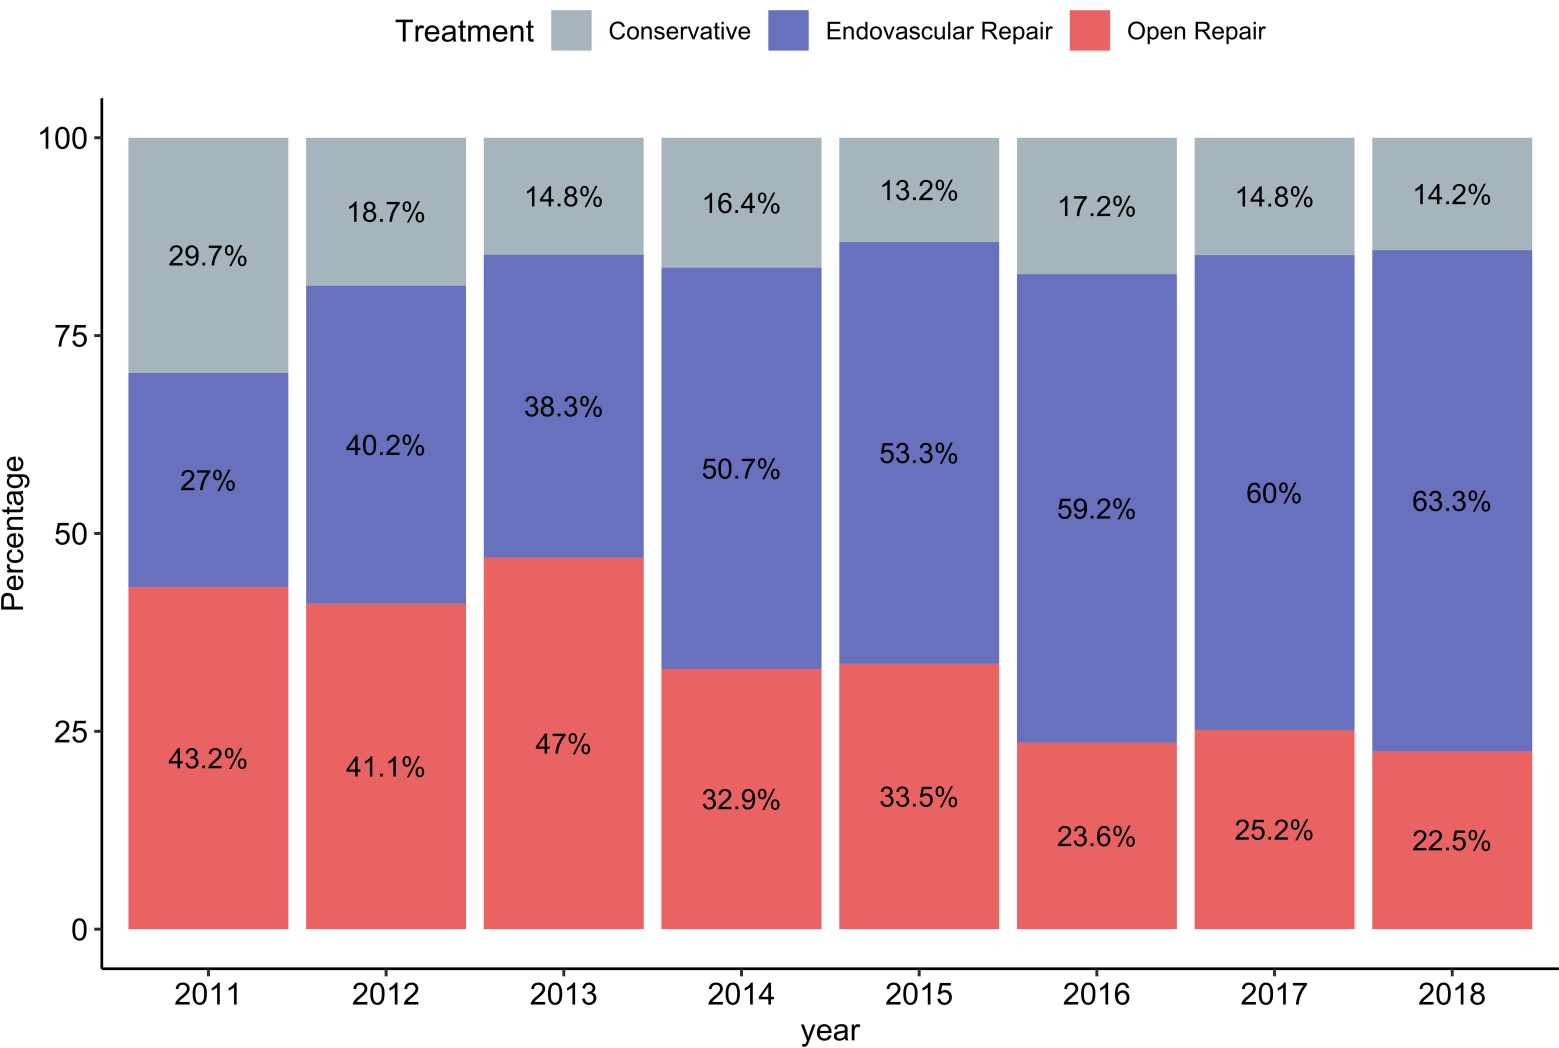

Supplement: s1 [file s1]
